# Supplementary material
Source: PubMed Central journal article supplement (PMC7826443)
Supplement: Supp_FigS2.pdf [file Supp_FigS2.pdf]

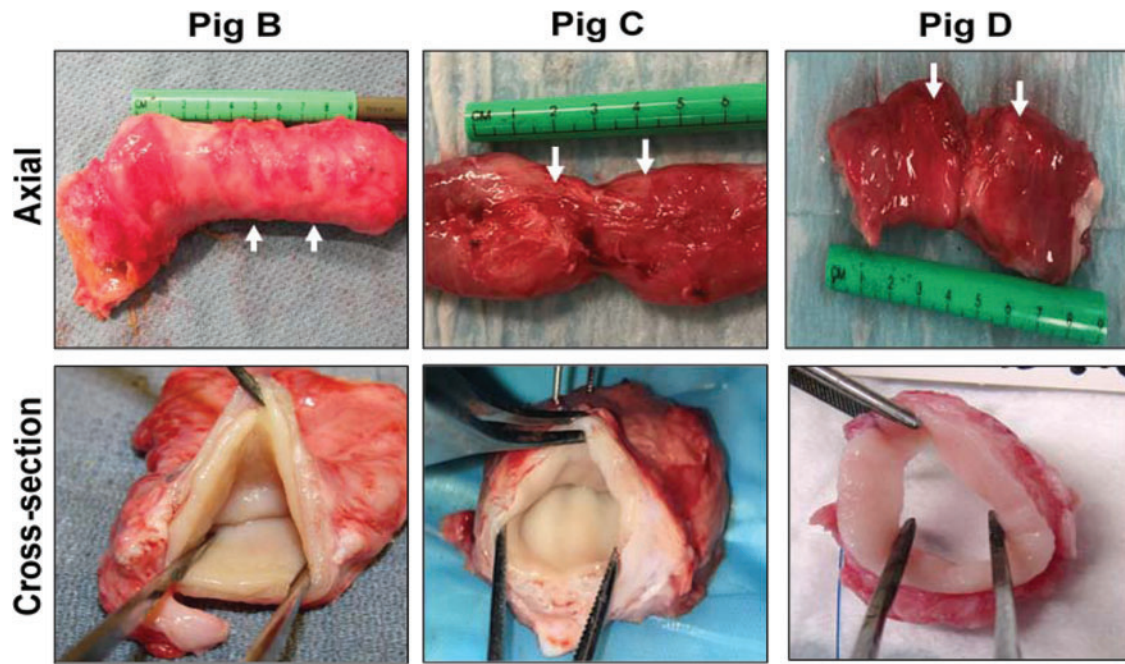

**SUPPLEMENTARY FIG. S2.** Necropsy assessments of esophageal neotissues in pilot Pigs B–D. Photomicrographs of axial (*top row*) and cross-sectional (*bottom row*) views of neoconduits from original biomaterial graft sites in Pigs B–D following harvest. *Arrows* denote anastomotic borders. Cross-sectional images of neotissues were taken through the central longitudinal axis.
